# Supplementary material for: Nanocluster-Based Ultralow-Temperature Driven Oxide Gate Dielectrics for High-Performance Organic Electronic Devices
Source: MDPI journal article supplement (doi:10.3390/ma13235571), 2020-12-07

# Nanocluster-Based Ultralow-Temperature Driven Oxide Gate Dielectrics for High-Performance Organic Electronic Devices

Jeong-Wan Jo <sup>1</sup>, Jingu Kang <sup>2</sup>, Kyung-Tae Kim <sup>2</sup>, Seung-Han Kang <sup>2</sup>, Jae-Cheol Shin <sup>2</sup>, Seung Beom Shin <sup>2</sup>, Yong-Hoon Kim <sup>3,4,\*</sup> and Sung Kyu Park <sup>2,\*</sup>

<sup>1</sup> Department of Electrical Engineering, University of Cambridge, Cambridge CB2 1TN, UK; jj531@cam.ac.uk

<sup>2</sup> School of Electrical and Electronic Engineering, Chung-Ang University, Seoul 06974, Korea; flykkokko@cau.ac.kr (J.K.); rudxo4812@cau.ac.kr (K.-T.K.); seunghank@cau.ac.kr (S.-H.K.); tsw0627@cau.ac.kr (J.-C.S.); kyocu6007@cau.ac.kr (S.B.S.)

<sup>3</sup> School of Advanced Materials Science and Engineering, Sungkyunkwan University, Suwon 16419, Korea

<sup>4</sup> SKKU Advanced Institute of Nanotechnology (SAINT), Sungkyunkwan University, Suwon 16419, Korea

\* Correspondence: yhkim76@skku.edu (Y.-H.K.); skpark@cau.ac.kr (S.K.P.)

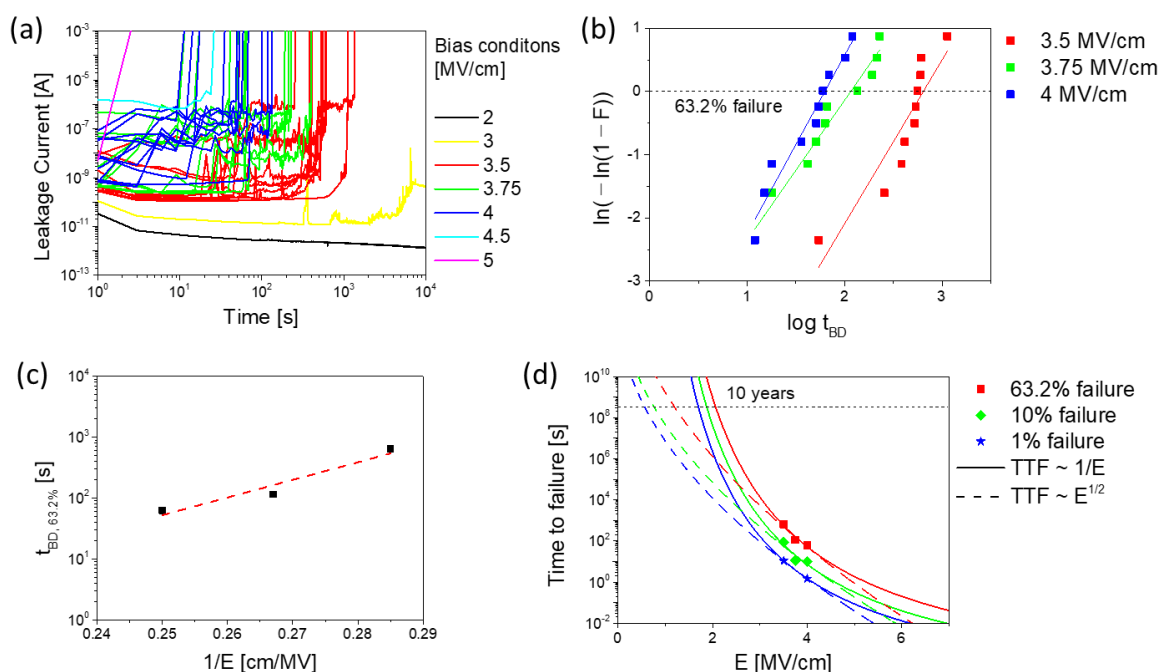

**Figure S1.** (a) Gate leakage current over time during a constant voltage stress for selected bias conditions of 2–5 MV/cm. (b) Weibull plot for the bias-dependent TDDDB measurements conducted on nanocluster-based  $\text{Al}_2\text{O}_3$  dielectric films. (c) Weibull scaling factor ( $t_{BD}$  at 63.2% failure) from bias-dependent TDDDB measurements as a function of  $1/E$ . (d) Lifetime of the nanocluster-based  $\text{Al}_2\text{O}_3$  gate dielectric at lower gate voltages extrapolated from TDDDB experiments. TTF for 63.2, 10, and 1% failure rate is shown.  $1/E$  model (solid line) and  $E^{1/2}$  model (dotted line) were used to extrapolate the maximum operation voltage.

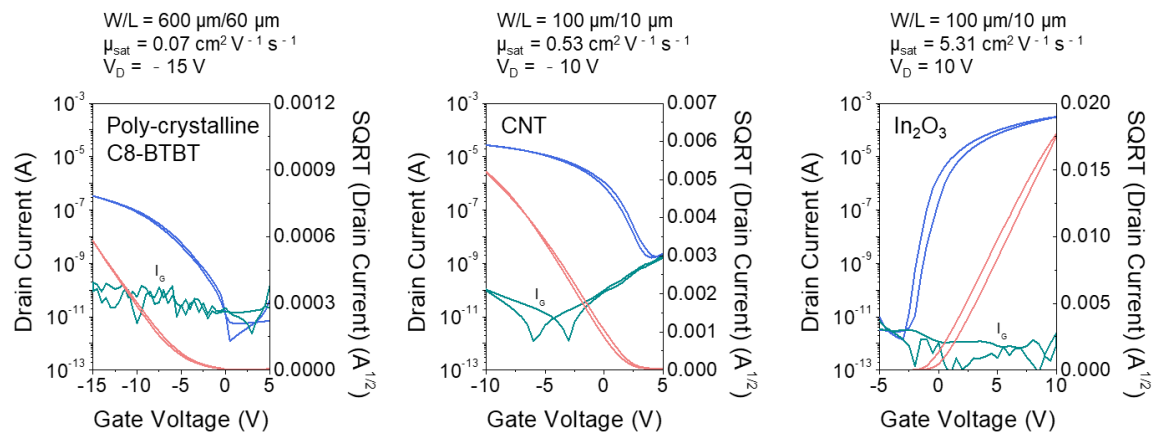

**Figure S2.** Representative transfer characteristics of poly-crystalline C8-BTBT, CNT, and indium oxide TFTs based on the nanocluster-based Al<sub>2</sub>O<sub>3</sub>.

**Table S1.** Summary of the extrapolated maximum operation voltages of the nanocluster-based Al<sub>2</sub>O<sub>3</sub> dielectric films comparing the lifetime models for 63.2, 10, and 1 % failure rate for 10 years lifetime.

| Model (Failure Rate)     | Maximum Operation Electric Field |
|--------------------------|----------------------------------|
| 1/E (63.2%)              | 2.07 MV/cm                       |
| 1/E (10%)                | 1.88 MV/cm                       |
| 1/E (1%)                 | 1.69 MV/cm                       |
| E <sup>1/2</sup> (63.2%) | 1.20 MV/cm                       |
| E <sup>1/2</sup> (10%)   | 0.75 MV/cm                       |
| E <sup>1/2</sup> (1%)    | 0.56 MV/cm                       |

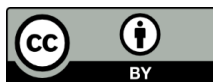

Supplement: s1 [file s1]
